# Supplementary material
Source: publisher figshare collection journal article supplement (https://karger.figshare.com/ndownloader/files/16261565)
Supplement: Supplementary file 1 [file 16261565]

## Sheet: Supp Table S1
SNP ID	F Primer	R Primer	amplicon size	Extension primer	Use
rs2514218	CCCTCTCTGAGCACTGAACA	TCCTGATGACCACCTACAGT	125bp	GGCTGAAGGTCATAGAGTCCTTG	Genotyping
rs6277	GGTCTCCACAGCACTCC	CTTCCTACGGCTCATGGTCT	147bp	GGTCTCCACAGCACTCC	Genotyping / allele-specific expression
rs7116768	TTCAAGCCATAGGGCGCCC	AGAGCCGGCCGAGCTG	186bp	TTCAAGCCATAGGGCGCCC	Genotyping / allele-specific expression
Supplementary Table S1. Primers used for genotyping and assessments of DRD2 allele-specific expression

## Sheet: Supp Table S2
	Heterozygous for rs2514218		Homozygous for rs2514218
	Mean age (range)	Sex	Mean age (range)	Sex
Samples assayed at DRD2 SNP rs6277	68 (26 - 95)	8M, 10F	70 (25 - 92)	12M, 9F
Samples assayed at DRD2 SNP rs7116768	74 (54 - 85)	4M, 3F	68 (25 - 102)	12M, 4F
Supplementary Table S2. Known demographics for post-mortem caudate samples assayed for DRD2 allelic expression
